# Supplementary material
Source: PubMed Central journal article supplement (PMC5585711)
Supplement: JB.00162-17_zjb999094513s1.pdf [file JB.00162-17_zjb999094513s1.pdf]

**TABLE S1** Primers used in this study.

| No. | Primer name    | Sequence (5'-3')                       |
|-----|----------------|----------------------------------------|
| 1   | eTK2284-F      | GGGCATATGGACAGGTACGTTCTTCTGGTTAAG      |
| 2   | eTK2284-R      | CCCGGATCCTCACCTCAGACTGAGCGCGTCCCTGAGTA |
| 3   | eTK0067-F      | AAAAAACATATGGTTAAGCGAGGCCTCTTC         |
| 4   | eTK0067-R      | AAAAAAGGATCCTTAAAATTCTGGAATCCT         |
| 5   | dTK2284-F      | AGGTTTCCTTTTAAACTTTTCGCTTTTCCCC        |
| 6   | dTK2284-R      | GACTCGGGGTGTATCCGCCTGAGCTGGCTCT        |
| 7   | inv-dTK2284-F  | AGGGACGCGCTCAGTCTGAGGTGAGAGCATG        |
| 8   | inv-dTK2284-R  | AGGGAAGTCCCTTCTCATCATCATTGAGCGT        |
| 9   | o-dTK2284-F    | AACAACCTCCAGGCGTTTCATAGCCCCA           |
| 10  | o-dTK2284-R    | GAGGGTTCTTACACAAGTGGAAGAAGGAGG         |
| 11  | i-dTK2284-F    | GACAGGTACGTTCTTCTGGTTAAGGCC            |
| 12  | i-dTK2284-R    | CCTCAGACTGAGCGCGTCCCTGAGTA             |
| 13  | so-dTK2284-F   | ACGACATCGTCCTCTATCCAAGCGGAAAG          |
| 14  | so-dTK2284-R   | GCAACGTGCGGCATCGCCCTCCATGTGTA          |
| 15  | s-dTK2284-1-f  | GACTCTAGAGGATCCCCGGGTAC                |
| 16  | s-dTK2284-1-r  | TCGATTTTTGTGATGCTCGTCA                 |
| 17  | s-dTK2284-2-f  | CGCTCAAGTCAGAGGTGGCGAAAC               |
| 18  | s-dTK2284-2-r  | TTGAGATCCTTTTTTCTGCGCGT                |
| 19  | s-dTK2284-3-f  | TTTTGTTTGCAAGCAGCAGATTACG              |
| 20  | s-dTK2284-3-r  | ACTTACTCTAGCTTCCCGGCAACAA              |
| 21  | s-dTK2284-4-f  | AGTTCGCCAGTTAATAGTTTGC                 |
| 22  | s-dTK2284-4-r  | GATGCTGAAGATCAGTTGGGTGC                |
| 23  | s-dTK2284-5-f  | TTTTACTTTCCACCAGCGTTTCTG               |
| 24  | s-dTK2284-5-r  | TACAATTTTATGGTGC                       |
| 25  | s-dTK2284-6-f  | AACGTTAATATTTTGTTAAAATTG               |
| 26  | s-dTK2284-6-r  | CCCTCTCCCTATCATAAACGTCGA               |
| 27  | s-dTK2284-7-f  | CACTTGAGATAGCGGAGTGCAC                 |
| 28  | s-dTK2284-7-r  | GCCTTGATGGCATCACTGGCTTTC               |
| 29  | s-dTK2284-8-f  | CGGTGCTGACTACGTGATAGTCGGG              |
| 30  | s-dTK2284-8-r  | GACCTGCAGGCATGCAAGCTTGGC               |
| 31  | s-dTK2284-9-f  | AGGTTTCCTTTTAAACTTTTCGCT               |
| 32  | s-dTK2284-9-r  | GCAACAAATGGGAACTTTTTGAGAGC             |
| 33  | s-dTK2284-10-f | GGTTGACATACAGGGGTTTATCCGT              |
| 34  | s-dTK2284-10-r | AGGGAAGTCCCTTCTCATCATCA                |
| 35  | s-dTK2284-11-f | AGGGACGCGCTCAGTCTGAGGTGA               |
| 36  | s-dTK2284-11-r | GCAGTGTGGATCCTAAACGCGGTG               |
| 37  | s-dTK2284-12-f | CAGGCTCTTCAAATGCCGCCCT                 |
| 38  | s-dTK2284-12-r | GACTCGGGGTGTATCCGCCTGAGCT              |

A  
i

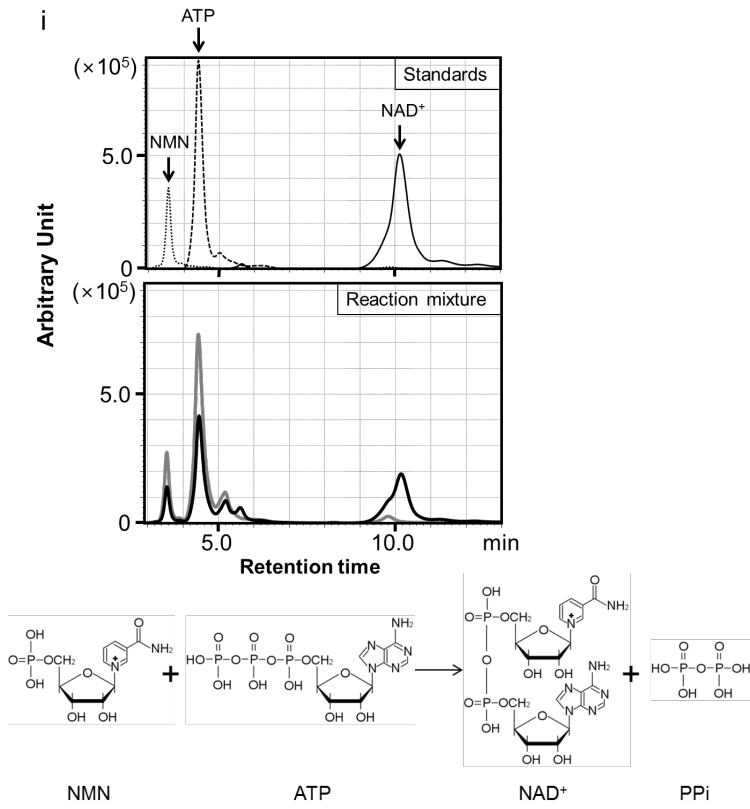

ii

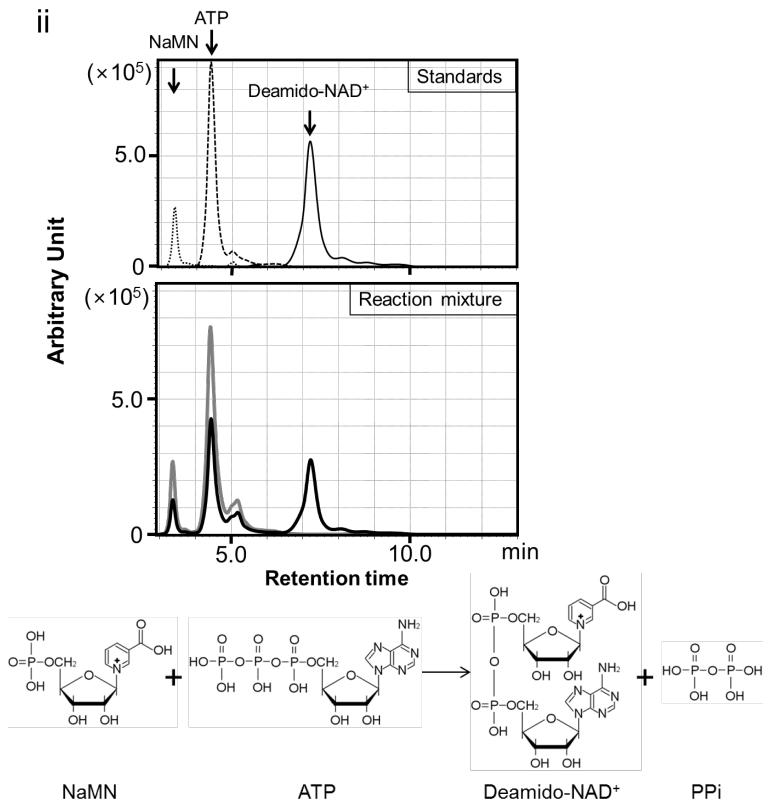

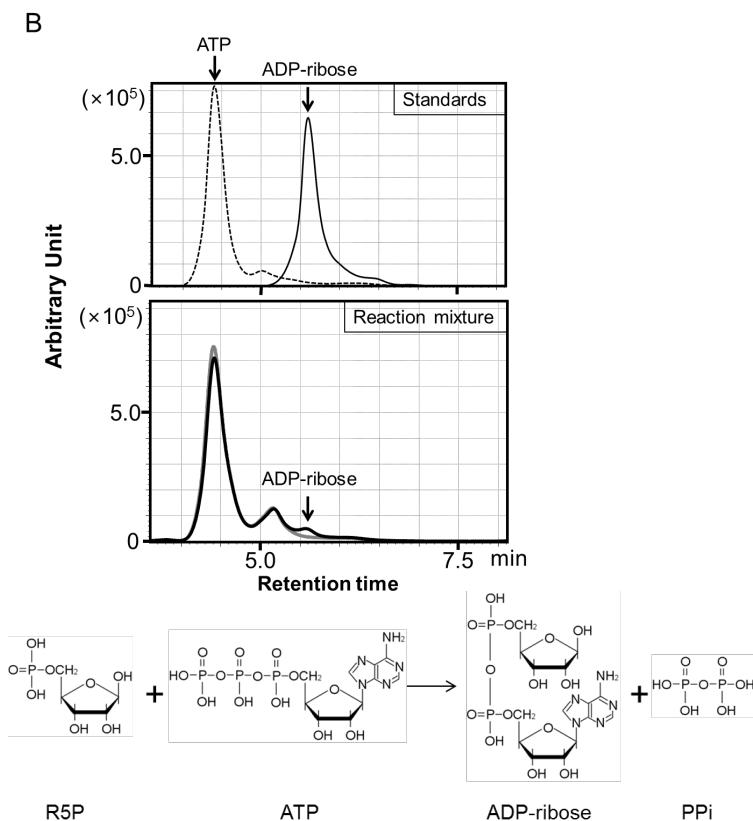

**FIG S1** Reactions catalyzed by the TK0067 protein. The upper chromatograms show the results with standard compounds and the lower chromatograms show those of the reaction mixtures, respectively. Chemical reactions are also shown. (A) The two major reactions catalyzed by the TK0067 protein. (i) The reaction from NMN and ATP to  $\text{NAD}^+$  and  $\text{PPi}$ . Upper chromatogram: thin solid line, 2 mM  $\text{NAD}^+$ ; thin dashed line, 2 mM ATP; thin dotted line, 2 mM NMN. Lower chromatogram: thick solid line, 2 mM NMN and ATP incubated with 1  $\mu\text{g}$  TK0067 protein at 85°C for 10 min; thick gray line, 2 mM NMN and ATP incubated at 85°C for 10 min. (ii) The reaction from NaMN and ATP to deamido- $\text{NAD}^+$  and  $\text{PPi}$ . Upper: thin solid line, 2 mM deamido- $\text{NAD}^+$ ; thin dashed line, 2 mM ATP; thin dotted line, 2 mM NaMN. Lower: thick solid line, 2 mM NaMN and ATP incubated with 1  $\mu\text{g}$  TK0067 protein at 85°C for 10 min; thick gray line, 2 mM NaMN and ATP incubated at 85°C for 10 min. (B) Side reaction catalyzed by the TK0067 protein converting R5P and ATP to ADP-ribose and  $\text{PPi}$ . Upper: thin solid line, 2 mM ADP-ribose; thin dashed line, 2 mM ATP. Lower: thick solid line, 2 mM R5P and ATP incubated with 10  $\mu\text{g}$  TK0067 protein at 85°C for 10 min; thick gray line, 2 mM R5P and ATP incubated at 85°C for 10 min.
